# Supplementary material for: Genomic and Transcriptomic Analysis Reveal Multiple Strategies for the Cadmium Tolerance in Vibrio parahaemolyticus N10-18 Isolated from Aquatic Animal Ostrea gigas Thunberg
Source: MDPI journal article supplement (doi:10.3390/foods11233777), 2022-11-23
Supplement: s1 [file s1]

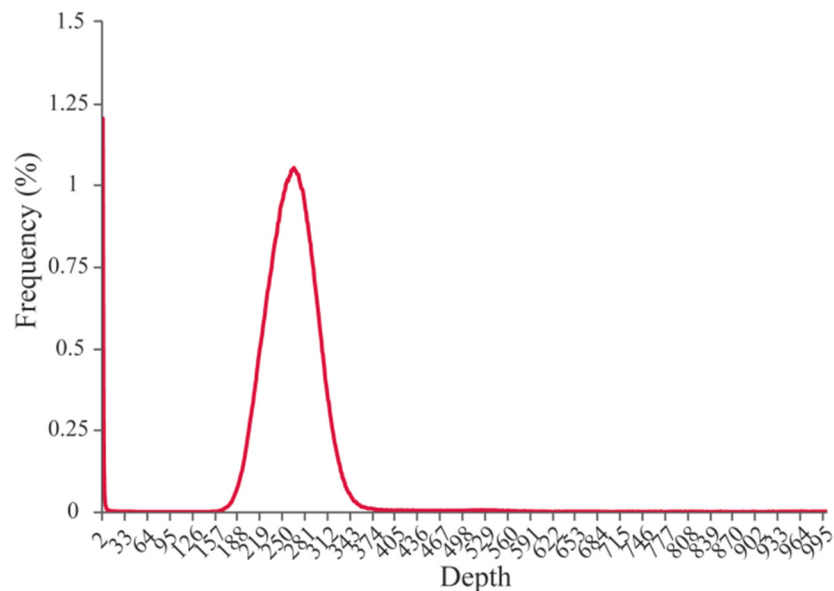

**Figure S1.** The k-mer analysis for *V. parahaemolyticus* N10-18 subread data based on the number of unique 17-mers.

**Table S1.** The genotype and phenotype of *V. parahaemolyticus* N10-18 isolate used in this study.

| Feature                          | <i>V. parahaemolyticus</i> N10-18  |
|----------------------------------|------------------------------------|
| Source                           | <i>Ostrea gigas thunberg</i>       |
| Genotype                         | <i>tdh/trh</i>                     |
| Heavy metal resistance phenotype | Cd <sup>2+</sup> /Zn <sup>2+</sup> |
| Antibiotic resistance phenotype  | AMP/KAN//STR                       |
| MIC value (μg/mL)                |                                    |
| Cd <sup>2+</sup>                 | 400                                |
| Zn <sup>2+</sup>                 | 1,600                              |
| AMP                              | 50,000                             |
| KAN                              | 128                                |
| STR                              | 128                                |

**Table S2.** The 65 *V. parahaemolyticus* genomes analyzed in the phylogenetic tree.

| <i>V. parahaemolyticus</i> Strain | Source                   | Collected Date | Serotype    | ST   | Location   | GenBank accession no. |
|-----------------------------------|--------------------------|----------------|-------------|------|------------|-----------------------|
| 64                                | <i>Penaeus vannamei</i>  | 2018           | O1: KUT     | 1    | China      | GCA_019321785.1       |
| 10329                             | Homo sapiens             | Missing        | O4/O12:K12  | 36   | Missing    | GCA_009649015.1       |
| 160807                            | <i>Penaeus vannamei</i>  | 2016           | O1: KUT     | 809  | China      | GCA_003691525.1       |
| 19-021-D1                         | <i>Penaeus vannamei</i>  | 2019           | O1: KUT     | 413  | SouthKorea | GCA_009734325.1       |
| 20_082A3                          | <i>Penaeus vannamei</i>  | 2020           | O1: KUT     | 413  | SouthKorea | GCA_015779285.1       |
| 20-082E4                          | <i>Penaeus vannamei</i>  | 2021           | O1: KUT     | 413  | SouthKorea | GCA_020041945.1       |
| 2010V-1106                        | Homo sapiens             | 2010           | O4/O12:K12  | 36   | Missing    | GCA_009764075.1       |
| 2012AW-0154                       | Missing                  | Missing        | O3: KUT     | 1727 | USA        | GCA_009665495.1       |
| 2012AW-0224                       | Missing                  | 2012           | O2: KUT     | 679  | USA        | GCA_009764055.1       |
| 2012AW-0353                       | Missing                  | 2012           | O3: KUT     | 1727 | USA        | GCA_009763445.1       |
| 20130629002S01                    | <i>Penaeus vannamei</i>  | 2013           | O1: KUT     | 1166 | China      | GCA_003085735.1       |
| 2013V-1136                        | Missing                  | Missing        | O1: KUT     | NAN  | Missing    | GCA_009763605.1       |
| 2013V-1146                        | Homo sapiens             | 2013           | O4/O12:K12  | 36   | USA        | GCA_009763645.1       |
| 2013V-1174                        | Homo sapiens             | 2013           | O4/O12:K55  | 34   | USA        | GCA_009763625.1       |
| 2013V-1181                        | Homo sapiens             | 2013           | O11: KUT    | 631  | USA        | GCA_009763565.1       |
| 2013V-1244                        | Homo sapiens             | 2013           | O1:K33/K55  | 162  | USA        | GCA_009763545.1       |
| 20140624012-1                     | <i>Penaeus vannamei</i>  | 2014           | O3:KUT      | NAN  | China      | GCA_009883815.1       |
| 20140722001-1                     | <i>Penaeus japonicus</i> | 2014           | O3:KUT      | 415  | China      | GCA_009883835.1       |
| 20140829008-1                     | <i>Penaeus vannamei</i>  | 2014           | O1:KUT      | 415  | China      | GCA_009883855.1       |
| 2014V-1066                        | Homo sapiens             | 2014           | O4/O12:K12  | 36   | USA        | GCA_009763525.1       |
| 2014V-1125                        | Homo sapiens             | 2014           | O4/O12:K12  | 36   | USA        | GCA_009763505.1       |
| 20151116002-3                     | <i>Penaeus japonicus</i> | 2015           | O1:KUT      | 1166 | China      | GCA_009883895.1       |
| 2015AW-0174                       | Homo sapiens             | 2015           | O4/O12:K12  | 36   | USA        | GCA_009763165.1       |
| 20160303005-1                     | <i>Penaeus vannamei</i>  | 2016           | O1:K68      | NAN  | China      | GCA_009883875.1       |
| AM43962                           | Missing                  | Missing        | O10/O12:K41 | NAN  | USA        | GCA_009763025.1       |
| AM46865                           | Homo sapiens             | Missing        | O8:K41      | 1815 | USA        | GCA_009763425.1       |
| AM51552                           | Missing                  | Missing        | O4/O12:K34  | NAN  | USA        | GCA_009763405.1       |
| ATCC_17802                        | Environment              | 1951           | O1:K1       | 1    | Japan      | GCA_001558495.2       |
| BB22OP                            | Environment              | 1980           | O4:K8       | 88   | Bangladesh | GCA_000328405.1       |
| BTXS2                             | Environment              | 2019           | O5:K30      | NAN  | China      | GCA_015172915.1       |
| CDC_K4557                         | Homo sapiens             | 2006           | O1:K33/K55  | 799  | USA        | GCA_000430425.1       |
| CHN25                             | Shrimps                  | 2011           | O5:K17      | 395  | China      | GCA_001700835.1       |
| D3112                             | Environment              | 2015           | OUT: K32    | NAN  | China      | GCA_004194515.1       |
| FB-11                             | <i>Penaeus vannamei</i>  | 2017           | O1: KUT     | 165  | China      | GCA_018135645.1       |
| FDA_R31                           | Oyster                   | 2007           | O1: KUT     | 23   | USA        | GCA_000430405.1       |
| FDAARGOS_191                      | Homo sapiens             | 1996           | O3:K6       | 3    | India      | GCA_002073775.2       |
| FDAARGOS_51                       | Homo sapiens             | 1998           | O4/O12:K12  | 36   | USA        | GCA_001188185.2       |
| FDAARGOS_662                      | Homo sapiens             | Missing        | O4/O12:K12  | 36   | USA        | GCA_008693745.1       |
| FDAARGOS_667                      | Homo sapiens             | Missing        | O5:K33/K55  | NAN  | USA        | GCA_008693625.1       |
| FORC_004                          | Environment              | 2014           | O6: KUT     | 1628 | SouthKorea | GCA_001433415.1       |
| FORC_006                          | Missing                  | 2014           | O2: KUT     | 1630 | SouthKorea | GCA_001304775.1       |
| FORC_008                          | finespotted flounder     | 2014           | O8:K41      | 984  | SouthKorea | GCA_001244315.1       |
| FORC_014                          | Toothfish                | 2015           | O5: KUT     | 1629 | SouthKorea | GCA_001636035.1       |
| FORC_018                          | Sea-bass                 | Missing        | O8:K41      | 984  | SouthKorea | GCA_001887055.1       |
| FORC_022                          | Marinated Crab           | Missing        | O3:KUT      | 233  | SouthKorea | GCA_001879585.1       |
| FORC_023                          | Homo sapiens             | 2014           | O5:KUT      | 2015 | SouthKorea | GCA_001758605.1       |
| FORC_071                          | Missing                  | 2017           | O11:KUT     | NAN  | SouthKorea | GCA_003612715.1       |

|              |                              |         |           |      |              |                 |
|--------------|------------------------------|---------|-----------|------|--------------|-----------------|
| FORC_072     | Missing                      | 2017    | O2:K28    | NAN  | SouthKorea   | GCA_003612695.1 |
| LVP_1        | Crayfish                     | 2013    | O2:KUT    | 2150 | China        | GCA_013393845.1 |
| LVP_2        | Crayfish                     | 2013    | O1:KUT    | NAN  | China        | GCA_013393865.1 |
| LVP_66       | Crayfish                     | 2013    | O1:KUT    | 1798 | China        | GCA_013393885.1 |
| MAVPQ        | Homo sapiens                 | 2011    | O11:KUT   | 631  | China        | GCA_001682175.1 |
| MAVP_Q       | Homo sapiens                 | 2011    | O11:KUT   | 631  | Missing      | GCA_002209725.2 |
| MAVP_R       | Homo sapiens                 | 2011    | O11:K15   | NAN  | Missing      | GCA_002220985.3 |
| MVP_1        | Environment                  | 2016    | O1:K68    | 1913 | Malaysia     | GCA_001996365.2 |
| N10-18       | <i>Ostrea gigas thunberg</i> | 2017    | O4/O11:K4 | 499  | China        | This_Study      |
| PB1937       | Shrimp                       | 2012    | O1:KUT    | 150  | China        | GCA_003351885.1 |
| R13          | <i>Penaeus vannamei</i>      | 2016    | O6:KUT    | NAN  | PacificOcean | GCA_003119375.1 |
| R14          | <i>Penaeus vannamei</i>      | 2016    | O6:KUT    | NAN  | PacificOcean | GCA_003076895.1 |
| RIMD_2210633 | Homo sapiens                 | 1996    | O3:K6     | 3    | Japan        | GCA_000196095.1 |
| S107-1       | Missing                      | Missing | O3:K12    | NAN  | Canada       | GCA_003047085.1 |
| TJA114       | <i>Penaeus vannamei</i>      | 2017    | O8:KUT    | 1743 | China        | GCA_014217295.1 |
| UCM-V493     | Environment                  | 2002    | O2:K28    | 471  | Spain        | GCA_000568495.1 |
| Vb0624       | Missing                      | 2015    | O7/O12:K6 | 163  | China        | GCA_006517795.1 |
| VP_D14       | Missing                      | 2012    | O3:K6     | 3    | China        | GCA_004006515.1 |

**Table S3.** The identified GIs, INs and ISs in the *V. parahaemolyticus* N10-18 genome.

| MGE | MGE ID | Location    | Scaffold Size (bp) | Start (bp) | End (bp) | CDS Gene |
|-----|--------|-------------|--------------------|------------|----------|----------|
| GI  | GI 1   | Scaffold 11 | 174,719            | 2,878      | 18,078   | 15       |
|     | GI 2   | Scaffold 14 | 108,661            | 88,409     | 103,363  | 13       |
| IN  | IN 1   | Scaffold 6  | 241,503            | 238,264    | 240,830  | 2        |
|     | IN 2   | Scaffold 7  | 227,777            | 165        | 227,764  | 210      |
|     | IN 3   | Scaffold 28 | 16,301             | 393        | 16,270   | 24       |
|     | IN 4   | Scaffold 35 | 5,031              | 118        | 4,013    | 5        |
|     | IN 5   | Scaffold 36 | 4,792              | 395        | 4,779    | 6        |
|     | IN 6   | Scaffold 39 | 4,094              | 109        | 3,975    | 5        |
|     | IN 7   | Scaffold 42 | 2,491              | 600        | 1,900    | 2        |
|     | IN 8   | Scaffold 45 | 1,727              | 360        | 1,270    | 2        |
| IS  | IS001  | Scaffold 29 | 12,178             | 1,418      | 2,745    | 1        |

**Table S4.** The potential virulence-associated genes identified in the *V. parahaemolyticus* N10-18 genome.

| Gene         | Description                                                             | Reference |
|--------------|-------------------------------------------------------------------------|-----------|
| <i>kdsA</i>  | 2-dehydro-3-deoxyphosphooctonate aldolase                               | [64]      |
| <i>gmd</i>   | GDP-mannose 4,6-dehydratase                                             | [63]      |
| <i>ilpA</i>  | immunogenic lipoprotein A                                               | [60]      |
| <i>MAM7</i>  | multivalent adhesion molecule 7                                         | [61]      |
| <i>gmhA</i>  | phosphoheptose isomerase                                                | [62]      |
| <i>tlh</i>   | thermolabile hemolysin TLH                                              | [49]      |
| <i>exsA</i>  | transcriptional regulator ExsA                                          | [86]      |
| <i>exsC</i>  | transcriptional regulator ExsC                                          | [86]      |
| <i>exsD</i>  | transcriptional regulator ExsD                                          | [86]      |
| <i>uscN</i>  | type III secretion system ATPase VscN                                   | [86]      |
| <i>vcrD</i>  | type III secretion system C ring protein VcrD                           | [104]     |
| <i>uscT</i>  | type III secretion system C ring protein VscT                           | [104]     |
| <i>vcrG</i>  | type III secretion system chaperone VcrG                                | [104]     |
| <i>vcrH</i>  | type III secretion system chaperone VcrH                                | [104]     |
| <i>vecA</i>  | Type III secretion system chaperone VecA                                | [105]     |
| <i>uscG</i>  | Type III secretion system chaperone VscG                                | [104]     |
| <i>uscW</i>  | Type III secretion system chaperone VscW                                | [105]     |
| <i>uscR</i>  | type III secretion system C-ring protein VscR                           | [104]     |
| <i>uscS</i>  | type III secretion system C-ring protein VscS                           | [104]     |
| <i>uscU</i>  | type III secretion system C-ring protein VscU                           | [104]     |
| <i>uscX</i>  | type III secretion system C-ring protein VscX for secretion specificity | [104]     |
| <i>uscY</i>  | type III secretion system C-ring protein VscY for secretion specificity | [104]     |
| <i>uscK</i>  | type III secretion system cytoplasmic protein VscK                      | [104]     |
| <i>uscL</i>  | type III secretion system cytoplasmic protein VscL                      | [104]     |
| <i>uscQ</i>  | type III secretion system cytoplasmic protein VscQ                      | [104]     |
| <i>vopQ</i>  | type III secretion system effector VopQ                                 | [104]     |
| /            | VPA0450 family T3SS effector inositol phosphatase                       |           |
| <i>vopR</i>  | Type III secretion system effector VopR                                 | [104]     |
| <i>vopS</i>  | type III secretion system effector VopS                                 | [104]     |
| <i>uscD</i>  | type III secretion system IM ring protein VscD                          | [104]     |
| <i>uscJ</i>  | type III secretion system IM ring protein VscJ                          | [104]     |
| <i>uscI</i>  | type III secretion system inner rod protein VscI                        | [104]     |
| <i>uscP</i>  | type III secretion system needle length control protein VscP            | [104]     |
| <i>uscF</i>  | type III secretion system needle protein VscF                           | [104]     |
| <i>vcrV</i>  | type III secretion system needle tip protein VcrV                       | [104]     |
| <i>uscC</i>  | type III secretion system OM ring protein VscC                          | [104]     |
| <i>vcrR</i>  | type III secretion system protein VcrR                                  | [104]     |
| <i>vopN</i>  | type III secretion system protein VopN                                  | [106]     |
| <i>uscH</i>  | type III secretion system protein VscH                                  | [104]     |
| <i>yscO</i>  | type III secretion system protein YscO                                  | [107]     |
| <i>tyeA</i>  | TyeA family type III secretion system gatekeeper subunit                | [104]     |
| <i>syncN</i> | type III secretion chaperone SycN                                       | [104]     |
| <i>uscB</i>  | YscB family type III secretion system chaperone VscB                    |           |
| <i>vopB</i>  | type III secretion system translocator protein VopB                     | [104]     |
| <i>vopD</i>  | type III secretion system translocator protein VopD                     | [104]     |

**Table S5.** The identified repeats in the *V. parahaemolyticus* N10-18 genome.

| Repeat ID             | Location          | Scaffold Size<br>(bp) | Repeat  |         |             |           |          |
|-----------------------|-------------------|-----------------------|---------|---------|-------------|-----------|----------|
|                       |                   |                       | Start   | End     | Length (bp) | Size (bp) | Copy No. |
| <b>Scaffold1_TR01</b> | <b>Scaffold 1</b> | 587,332               | 29,533  | 29,578  | 46          | 21        | 2.2      |
| Scaffold2_TR03        | Scaffold 2        | 573,558               | 571,252 | 571,302 | 51          | 6         | 8.5      |
| Scaffold3_TR05        | Scaffold 3        | 557,129               | 447,180 | 447,219 | 40          | 6         | 6.7      |
| Scaffold4_TR11        | Scaffold 4        | 384,640               | 367,028 | 367,091 | 64          | 7         | 9.1      |
| Scaffold5_TR12        | Scaffold 5        | 360,589               | 347,209 | 347,720 | 512         | 256       | 2        |
| Scaffold6_TR14        | Scaffold 6        | 241,503               | 237,484 | 237,527 | 44          | 9         | 4.9      |
| Scaffold9_TR16        | Scaffold 9        | 194,495               | 128,107 | 128,790 | 684         | 342       | 2        |
| Scaffold10_TR17       | Scaffold 10       | 177,419               | 129,106 | 129,177 | 72          | 24        | 3        |
| Scaffold11_TR23       | Scaffold 11       | 174,719               | 123,775 | 124,090 | 316         | 115       | 2.7      |
| Scaffold12_TR26       | Scaffold 12       | 162,127               | 149,472 | 149,528 | 57          | 24        | 2.4      |
| Scaffold13_TR29       | Scaffold 13       | 122,373               | 72,353  | 72,934  | 582         | 251       | 2.3      |
| Scaffold14_TR30       | Scaffold 14       | 108,661               | 91,020  | 91,090  | 71          | 33        | 2.2      |
| Scaffold18_TR31       | Scaffold 18       | 75,503                | 67,524  | 67,784  | 261         | 131       | 2        |
| Scaffold20_TR32       | Scaffold 20       | 60,684                | 370     | 827     | 458         | 229       | 2        |
| Scaffold24_TR33       | Scaffold 24       | 34,923                | 17,263  | 17,310  | 48          | 6         | 8        |
| Scaffold25_TR34       | Scaffold 25       | 31,664                | 4,529   | 4,583   | 55          | 6         | 9.2      |
| Scaffold26_TR35       | Scaffold 26       | 24,272                | 20,208  | 20,599  | 392         | 212       | 1.8      |
| Scaffold28_TR36       | Scaffold 28       | 16,301                | 13,702  | 13,867  | 166         | 82        | 2        |
| Scaffold29_TR37       | Scaffold 29       | 12,178                | 9,940   | 10,329  | 390         | 195       | 2        |
| Scaffold31_TR39       | Scaffold 31       | 11,167                | 10,108  | 11,167  | 1,060       | 366       | 2.9      |
| Scaffold39_TR40       | Scaffold 39       | 4,094                 | 2,963   | 3,271   | 309         | 155       | 2        |
| Scaffold41_TR41       | Scaffold 41       | 3,344                 | 2,095   | 2,237   | 143         | 72        | 2        |
| Scaffold42_TR42       | Scaffold 42       | 2,491                 | 1,586   | 1,797   | 212         | 106       | 2        |

**Table S6.** Oligonucleotide primers used in the RT-PCR assay.

| Target gene | Primer                   | Sequence (5' to 3')    | Predicted size<br>(bp) | Reference     |
|-------------|--------------------------|------------------------|------------------------|---------------|
| <i>znuA</i> | <i>Vp_N10_18_1679</i> -F | TTGCGGCTAAAGATAAGGAA   | 138                    | In this study |
|             | <i>Vp_N10_18_1679</i> -R | CGGGAGTCACCGTAAAGTGT   |                        |               |
| <i>znuC</i> | <i>Vp_N10_18_1680</i> -F | CTGCTACAACGCCCTGACTT   | 208                    | In this study |
|             | <i>Vp_N10_18_1680</i> -R | GTGATCCCGAACAACAAACG   |                        |               |
| <i>tenA</i> | <i>Vp_N10_18_1694</i> -F | GCCCACCATGTTACCTACTGC  | 277                    | In this study |
|             | <i>Vp_N10_18_1094</i> -R | CCACGCCTGATTGGA ACTCTT |                        |               |
| 16s RNA     | 16s RNA-F                | GACACGGTCCAGACTCCTAC   | 179                    | [25]          |
|             | 16s RNA-R                | GGTGCTTCTTCTGTCGCTAAC  |                        |               |

**Table S7.** Expression of representative DEGs by the RT-PCR assay.

| Gene                  | Predicted protein                                   | Fold change |        |
|-----------------------|-----------------------------------------------------|-------------|--------|
|                       |                                                     | RNA-Seq.    | RT-PCR |
| <i>Vp_N10_18_1679</i> | Zinc ABC transporter substrate-binding protein ZnuA | 11.609      | 20.956 |
| <i>Vp_N10_18_1680</i> | Zinc ABC transporter ATP-binding protein ZnuC       | 9.190       | 9.626  |
| <i>Vp_N10_18_1094</i> | Thiaminase II                                       | 2.615       | 2.043  |
